# Supplementary material
Source: PubMed Central journal article supplement (PMC555471)
Supplement: pnas_102_12_4536__2.pdf [file pnas_102_12_4536__2.pdf]

| Diameters ( $\mu\text{M}$ ) | 10   | 15   | 20   | 25   | 30   | 35   | 40   | Total |
|-----------------------------|------|------|------|------|------|------|------|-------|
| Total Cells 1               | 107  | 98   | 44   | 35   | 28   | 19   | 13   | 344   |
| CCR1 positive               | 87   | 74   | 20   | 17   | 11   | 5    | 2    | 216   |
| frequency 1                 | 0.40 | 0.34 | 0.09 | 0.08 | 0.05 | 0.02 | 0.01 | 1.00  |
| Total Cells 2               | 97   | 110  | 43   | 37   | 24   | 16   | 11   | 338   |
| TRPV1 positive              | 81   | 62   | 15   | 0    | 0    | 0    | 0    | 158   |
| frequency 2                 | 0.51 | 0.39 | 0.09 | 0.00 | 0.00 | 0.00 | 0.00 | 1.00  |
